# Supplementary material for: Effects of cognitive behaviour therapy for worry on persecutory delusions in patients with psychosis (WIT): a parallel, single-blind, randomised controlled trial with a mediation analysis
Source: PubMed Central journal article supplement (PMC4698664; doi:10.1016/s2215-0366(15)00039-5), 2015-03-31
Supplement: mmc1.pdf [file mmc1.pdf]

# THE LANCET Psychiatry

## Supplementary appendix

This appendix formed part of the original submission and has been peer reviewed. We post it as supplied by the authors.

Supplement to: Freeman D, Dunn G, Startup H, et al. Effects of cognitive behaviour therapy for worry on persecutory delusions in patients with psychosis (WIT): a parallel, single-blind, randomised controlled trial with a mediation analysis. *Lancet Psychiatry* 2015; published online March 4. [http://dx.doi.org/10.1016/S2215-0366\(15\)00039-5](http://dx.doi.org/10.1016/S2215-0366(15)00039-5).

## Mplus Mediation Model for the Worry Intervention Trial (WIT)

### (a) Model used for the main mediation analyses

Important components of the output **highlighted**.

#### Input instructions

Title:

Stata2Mplus conversion for WiTmediation2.dta  
List of variables converted shown below

Centre :

0: Oxford

1: Southampton

Worryscorestrata :

0: Moderate worry score

1: High worry score

WorryMainMeasure\_Baseline :

WorryMainMeasure\_8WEEK :

WorryMeasure\_24WEEK :

PSYRATS\_total\_Baseline :

PSYRATS\_total\_8WEEK :

PSYRATS\_total\_24WEEK :

treat :

Interact :

Data:

File is WiTmediation2.dat ;

Variable:

Names are

Centre Wstratum Worry0 Worry8 Worry24

PSY0 PSY8 PSY24

treat Interact ID;

Usevariables=Centre Wstratum Worry0 Worry8 Worry24

psy0 psy8 psy24 treat interact;

Missing are all (-9999) ;

Analysis:

Type = general;

Iterations=10000;

Model:

worryfac by worry8@1 worry24@1;

worry8 worry24 (1);

[worry8@0 worry24@0];

worry8 with psy8;

worry24 with psy24;

psyfac by psy8@1 psy24@1;

psy8 psy24 (2);

[psy8@0 psy24@0];

worryfac on treat (A)

Centre Wstratum Interact worry0 psy0;

psyfac on worryfac (B)

treat (C)

Centre Wstratum Interact worry0 psy0;

worryfac with psyfac@0;  
worryfac psyfac;  
[worryfac psyfac];

Model indirect:  
psyfac ind treat ;

! MODEL CONSTRAINT:  
! new (D propmed);  
! D=A\*B;  
! propmed=D/(D + C);

Output:  
cinterval;

### Model fit information

Number of Free Parameters 21

Loglikelihood

H0 Value -1766.801  
H1 Value -1756.784

Information Criteria

Akaike (AIC) 3575.601  
Bayesian (BIC) 3637.821  
Sample-Size Adjusted BIC 3571.374  
( $n^* = (n + 2) / 24$ )

### Chi-Square Test of Model Fit

Value 20.034  
Degrees of Freedom 17  
P-Value 0.2725

### RMSEA (Root Mean Square Error Of Approximation)

Estimate 0.035  
90 Percent C.I. 0.000 0.087  
Probability RMSEA  $\leq$  .05 0.621

CFI/TLI

CFI 0.992  
TLI 0.985

Chi-Square Test of Model Fit for the Baseline Model

Value 390.351  
Degrees of Freedom 30  
P-Value 0.0000

SRMR (Standardized Root Mean Square Residual)

Value 0.065

## Model results

|                           | Estimate | S.E.  | Two-Tailed<br>Est./S.E. | P-Value |
|---------------------------|----------|-------|-------------------------|---------|
| <b>WORRYFAC BY</b>        |          |       |                         |         |
| WORRY8                    | 1.000    | 0.000 | 999.000                 | 999.000 |
| WORRY24                   | 1.000    | 0.000 | 999.000                 | 999.000 |
| <b>PSYFAC BY</b>          |          |       |                         |         |
| PSY8                      | 1.000    | 0.000 | 999.000                 | 999.000 |
| PSY24                     | 1.000    | 0.000 | 999.000                 | 999.000 |
| <b>PSYFAC ON</b>          |          |       |                         |         |
| WORRYFAC                  | 0.270    | 0.059 | 4.561                   | 0.000   |
| <b>WORRYFAC ON</b>        |          |       |                         |         |
| TREAT                     | -5.660   | 1.318 | -4.295                  | 0.000   |
| CENTRE                    | -3.725   | 2.021 | -1.844                  | 0.065   |
| WSTRATUM                  | -5.354   | 2.589 | -2.068                  | 0.039   |
| INTERACT                  | 8.084    | 2.660 | 3.039                   | 0.002   |
| WORRY0                    | 0.601    | 0.130 | 4.616                   | 0.000   |
| PSY0                      | 0.358    | 0.260 | 1.381                   | 0.167   |
| <b>PSYFAC ON</b>          |          |       |                         |         |
| TREAT                     | -0.804   | 0.647 | -1.242                  | 0.214   |
| CENTRE                    | 0.833    | 0.879 | 0.947                   | 0.343   |
| WSTRATUM                  | -0.490   | 1.132 | -0.432                  | 0.666   |
| INTERACT                  | -0.926   | 1.216 | -0.762                  | 0.446   |
| WORRY0                    | -0.069   | 0.065 | -1.052                  | 0.293   |
| PSY0                      | 0.691    | 0.111 | 6.211                   | 0.000   |
| <b>WORRYFAC WITH</b>      |          |       |                         |         |
| PSYFAC                    | 0.000    | 0.000 | 999.000                 | 999.000 |
| <b>WORRY8 WITH</b>        |          |       |                         |         |
| PSY8                      | 10.896   | 2.241 | 4.862                   | 0.000   |
| <b>WORRY24 WITH</b>       |          |       |                         |         |
| PSY24                     | 3.663    | 2.307 | 1.588                   | 0.112   |
| <b>Intercepts</b>         |          |       |                         |         |
| WORRY8                    | 0.000    | 0.000 | 999.000                 | 999.000 |
| WORRY24                   | 0.000    | 0.000 | 999.000                 | 999.000 |
| PSY8                      | 0.000    | 0.000 | 999.000                 | 999.000 |
| PSY24                     | 0.000    | 0.000 | 999.000                 | 999.000 |
| WORRYFAC                  | 17.787   | 7.067 | 2.517                   | 0.012   |
| PSYFAC                    | -8.161   | 3.156 | -2.586                  | 0.010   |
| <b>Residual Variances</b> |          |       |                         |         |
| WORRY8                    | 44.842   | 5.351 | 8.381                   | 0.000   |
| WORRY24                   | 44.842   | 5.351 | 8.381                   | 0.000   |
| PSY8                      | 7.926    | 0.931 | 8.514                   | 0.000   |
| PSY24                     | 7.926    | 0.931 | 8.514                   | 0.000   |
| WORRYFAC                  | 38.989   | 7.664 | 5.088                   | 0.000   |
| PSYFAC                    | 7.432    | 1.349 | 5.509                   | 0.000   |

**(b) Equivalent Latent Change Score Model**

ANALYSIS: ESTIMATOR = ML;  
INFORMATION = OBSERVED;  
ITERATIONS = 50000;

MODEL:

!driving variables: M

Worry8 ON Worry0@1;  
Worry24 ON Worry0@1;  
Wchange BY Worry8@1 Worry24@1;

Worry8\*5 Worry24\*5 (e1);

[Worry8@0 Worry24@0];

Wchange ON Worry0 (a1);

Wchange\*5;  
[Wchange\*0];

!driving variable: Y

PSY8 ON PSY0@1;  
PSY24 ON PSY0@1;  
Pchange BY PSY8@1 PSY24@1;

PSY8\*5 PSY24\*5 (e2);  
[PSY8@0 PSY24@0];

Pchange ON PSY0 (a2);

Pchange\*5 ;  
[Pchange\*0];

!bivariate relationships

Wchange ON PSY0 Worry0;

Pchange ON Worry0 PSY0 ;

Pchange ON Wchange (b7);

Worry8 with PSY8\*0.2; (c1)  
Worry24 with PSY24\*0.2; (c1)

!group effects

Wchange ON treat\*0 (g1)  
centre wstratum interact;  
Pchange ON treat\*0 (g3)  
centre wstratum interact;  
Wchange with Pchange@0;

MODEL CONSTRAINT:

NEW (IND DIR TEY);  
IND = b7\*g1; !indirect effect of y1  
DIR = g3; !direct effect of y1  
TEY = g3 + b7\*g1;

### Model fit information

Number of Free Parameters 21

#### Loglikelihood

H0 Value -1766.801  
H1 Value -1756.784

#### Information Criteria

Akaike (AIC) 3575.601  
Bayesian (BIC) 3637.821  
Sample-Size Adjusted BIC 3571.374  
( $n^* = (n + 2) / 24$ )

#### Chi-Square Test of Model Fit

Value 20.034  
Degrees of Freedom 17  
P-Value 0.2725

#### RMSEA (Root Mean Square Error Of Approximation)

Estimate 0.035  
90 Percent C.I. 0.000 0.087  
Probability RMSEA  $\leq$  .05 0.621

#### CFI/TLI

CFI 0.992  
TLI 0.985

#### Chi-Square Test of Model Fit for the Baseline Model

Value 390.351  
Degrees of Freedom 30  
P-Value 0.0000

#### SRMR (Standardized Root Mean Square Residual)

Value 0.065

**Model results**

|                     | Estimate | S.E.  | Two-Tailed<br>Est./S.E. | P-Value |
|---------------------|----------|-------|-------------------------|---------|
| <b>WCHANGE BY</b>   |          |       |                         |         |
| WORRY8              | 1.000    | 0.000 | 999.000                 | 999.000 |
| WORRY24             | 1.000    | 0.000 | 999.000                 | 999.000 |
| <b>PCHANGE BY</b>   |          |       |                         |         |
| PSY8                | 1.000    | 0.000 | 999.000                 | 999.000 |
| PSY24               | 1.000    | 0.000 | 999.000                 | 999.000 |
| <b>PCHANGE ON</b>   |          |       |                         |         |
| WCHANGE             | 0.270    | 0.059 | 4.560                   | 0.000   |
| <b>WCHANGE ON</b>   |          |       |                         |         |
| WORRY0              | -0.399   | 0.130 | -3.061                  | 0.002   |
| PSY0                | 0.358    | 0.260 | 1.381                   | 0.167   |
| TREAT               | -5.660   | 1.318 | -4.295                  | 0.000   |
| CENTRE              | -3.725   | 2.021 | -1.844                  | 0.065   |
| WSTRATUM            | -5.354   | 2.589 | -2.068                  | 0.039   |
| INTERACT            | 8.084    | 2.660 | 3.039                   | 0.002   |
| <b>PCHANGE ON</b>   |          |       |                         |         |
| PSY0                | -0.309   | 0.111 | -2.780                  | 0.005   |
| WORRY0              | 0.201    | 0.060 | 3.366                   | 0.001   |
| TREAT               | -0.803   | 0.647 | -1.242                  | 0.214   |
| CENTRE              | 0.833    | 0.879 | 0.948                   | 0.343   |
| WSTRATUM            | -0.489   | 1.132 | -0.432                  | 0.666   |
| INTERACT            | -0.926   | 1.216 | -0.762                  | 0.446   |
| <b>WORRY8 ON</b>    |          |       |                         |         |
| WORRY0              | 1.000    | 0.000 | 999.000                 | 999.000 |
| <b>WORRY24 ON</b>   |          |       |                         |         |
| WORRY0              | 1.000    | 0.000 | 999.000                 | 999.000 |
| <b>PSY8 ON</b>      |          |       |                         |         |
| PSY0                | 1.000    | 0.000 | 999.000                 | 999.000 |
| <b>PSY24 ON</b>     |          |       |                         |         |
| PSY0                | 1.000    | 0.000 | 999.000                 | 999.000 |
| <b>WCHANGE WITH</b> |          |       |                         |         |
| PCHANGE             | 0.000    | 0.000 | 999.000                 | 999.000 |
| <b>WORRY8 WITH</b>  |          |       |                         |         |
| PSY8                | 10.896   | 2.241 | 4.862                   | 0.000   |
| <b>WORRY24 WITH</b> |          |       |                         |         |
| PSY24               | 3.663    | 2.307 | 1.588                   | 0.112   |
| <b>Intercepts</b>   |          |       |                         |         |
| WORRY8              | 0.000    | 0.000 | 999.000                 | 999.000 |
| WORRY24             | 0.000    | 0.000 | 999.000                 | 999.000 |
| PSY8                | 0.000    | 0.000 | 999.000                 | 999.000 |
| PSY24               | 0.000    | 0.000 | 999.000                 | 999.000 |
| WCHANGE             | 17.786   | 7.067 | 2.517                   | 0.012   |
| PCHANGE             | -8.161   | 3.156 | -2.586                  | 0.010   |

Residual Variances

|         |        |       |       |       |
|---------|--------|-------|-------|-------|
| WORRY8  | 44.845 | 5.351 | 8.380 | 0.000 |
| WORRY24 | 44.845 | 5.351 | 8.380 | 0.000 |
| PSY8    | 7.926  | 0.931 | 8.514 | 0.000 |
| PSY24   | 7.926  | 0.931 | 8.514 | 0.000 |
| WCHANGE | 38.989 | 7.664 | 5.087 | 0.000 |
| PCHANGE | 7.432  | 1.349 | 5.509 | 0.000 |

New/Additional Parameters

|     |        |       |        |       |
|-----|--------|-------|--------|-------|
| IND | -1.526 | 0.486 | -3.142 | 0.002 |
| DIR | -0.803 | 0.647 | -1.242 | 0.214 |
| TEY | -2.330 | 0.636 | -3.664 | 0.000 |



## Results of the moderation analysis

(Each potential moderator is included as an additional covariate before evaluating the possible treatment by moderator interaction.)

```
-----
name: <unnamed>
log: C:\Users\MDEASGD2\Documents\Projects_Trials\Worry Intervention Trial\Worry Trial
Results\Moderators GD29March14.log
log type: text
opened on: 29 Mar 2014, 14:21:54
```

```
. xi: regress WorryMainMeasure_8WEEK WorryMainMeasure_Baseline i.Centre*i.Worryscorestrata
i.treat
i.Centre      _ICentre_0-1      (naturally coded; _ICentre_0 omitted)
i.Worryscores~a  _IWorryscor_0-1      (naturally coded; _IWorryscor_0 omitted)
i.Cen~e*i.Wor~a  _ICenXWor_#_#      (coded as above)
i.treat        _Itreat_0-1      (naturally coded; _Itreat_0 omitted)
```

| Source   | SS         | df  | MS         | Number of obs = | 143    |
|----------|------------|-----|------------|-----------------|--------|
| Model    | 7137.10754 | 5   | 1427.42151 | F( 5, 137) =    | 15.55  |
| Residual | 12576.6407 | 137 | 91.8002972 | Prob > F =      | 0.0000 |
|          |            |     |            | R-squared =     | 0.3620 |
|          |            |     |            | Adj R-squared = | 0.3388 |
| Total    | 19713.7483 | 142 | 138.829213 | Root MSE =      | 9.5812 |

| WorryMainMeasure_8WEEK    | Coef.     | Std. Err. | t     | P> t  | [95% Conf. Interval] |
|---------------------------|-----------|-----------|-------|-------|----------------------|
| WorryMainMeasure_Baseline | .7170737  | .1481978  | 4.84  | 0.000 | .4240228 1.010125    |
| _ICentre_1                | -5.017858 | 2.48309   | -2.02 | 0.045 | -9.927997 -.1077179  |
| _IWorryscor_1             | -6.263745 | 3.167678  | -1.98 | 0.050 | -12.52761 .0001214   |
| _ICenXWor_1_1             | 9.870977  | 3.254168  | 3.03  | 0.003 | 3.436084 16.30587    |
| _Itreat_1                 | -6.347129 | 1.604075  | -3.96 | 0.000 | -9.519076 -3.175182  |
| _cons                     | 17.80341  | 8.467442  | 2.10  | 0.037 | 1.059628 34.5472     |

```
. xi: regress WorryMainMeasure_8WEEK WorryMainMeasure_Baseline i.Centre*i.Worryscorestrata
i.treat*WAIS_WMDigitForward
i.Centre      _ICentre_0-1      (naturally coded; _ICentre_0 omitted)
i.Worryscores~a  _IWorryscor_0-1      (naturally coded; _IWorryscor_0 omitted)
i.Cen~e*i.Wor~a  _ICenXWor_#_#      (coded as above)
i.treat        _Itreat_0-1      (naturally coded; _Itreat_0 omitted)
i.treat*WAIS_~d  _ItreXWAIS_#_#      (coded as above)
```

| Source   | SS         | df  | MS         | Number of obs = | 120    |
|----------|------------|-----|------------|-----------------|--------|
| Model    | 6314.40305 | 7   | 902.057578 | F( 7, 112) =    | 9.41   |
| Residual | 10741.3886 | 112 | 95.9052555 | Prob > F =      | 0.0000 |
|          |            |     |            | R-squared =     | 0.3702 |
|          |            |     |            | Adj R-squared = | 0.3309 |
| Total    | 17055.7917 | 119 | 143.32598  | Root MSE =      | 9.7931 |

| WorryMainMeasure_8WEEK    | Coef.     | Std. Err. | t     | P> t  | [95% Conf. Interval] |
|---------------------------|-----------|-----------|-------|-------|----------------------|
| WorryMainMeasure_Baseline | .7407661  | .1626941  | 4.55  | 0.000 | .4184087 1.063124    |
| _ICentre_1                | -3.910217 | 2.87373   | -1.36 | 0.176 | -9.604145 1.783711   |
| _IWorryscor_1             | -7.560774 | 3.424847  | -2.21 | 0.029 | -14.34667 -.7748787  |
| _ICenXWor_1_1             | 8.672159  | 3.689063  | 2.35  | 0.020 | 1.362753 15.98157    |
| _Itreat_1                 | -4.73499  | 7.339495  | -0.65 | 0.520 | -19.27726 9.807278   |
| WAIS_WMDigitForward       | -.3925623 | .5234837  | -0.75 | 0.455 | -1.429778 .6446535   |
| _ItreXWAIS_1              | -.2448256 | .7458686  | -0.33 | 0.743 | -1.722669 1.233018   |
| _cons                     | 20.93953  | 11.23968  | 1.86  | 0.065 | -1.330461 43.20952   |

```
. xi: regress WorryMainMeasure_8WEEK WorryMainMeasure_Baseline i.Centre*i.Worryscorestrata
i.treat*WAIS_WMDigitBack
i.Centre      _ICentre_0-1      (naturally coded; _ICentre_0 omitted)
i.Worryscores~a  _IWorryscor_0-1      (naturally coded; _IWorryscor_0 omitted)
i.Cen~e*i.Wor~a  _ICenXWor_#_#      (coded as above)
i.treat        _Itreat_0-1      (naturally coded; _Itreat_0 omitted)
i.treat*WAIS_~k  _ItreXWAIS_#_#      (coded as above)
```

| Source | SS | df | MS | Number of obs = | 119   |
|--------|----|----|----|-----------------|-------|
|        |    |    |    | F( 7, 111) =    | 10.55 |

|          |  |            |     |            |               |   |        |
|----------|--|------------|-----|------------|---------------|---|--------|
| Model    |  | 6788.41433 | 7   | 969.773476 | Prob > F      | = | 0.0000 |
| Residual |  | 10199.4344 | 111 | 91.8867965 | R-squared     | = | 0.3996 |
| -----    |  |            |     |            | Adj R-squared | = | 0.3617 |
| Total    |  | 16987.8487 | 118 | 143.96482  | Root MSE      | = | 9.5858 |

| WorryMainMeasure_8WEEK    | Coef.     | Std. Err. | t     | P> t  | [95% Conf. Interval] |           |
|---------------------------|-----------|-----------|-------|-------|----------------------|-----------|
| WorryMainMeasure_Baseline | .738846   | .159108   | 4.64  | 0.000 | .4235629             | 1.054129  |
| _ICentre_1                | -4.141688 | 2.838673  | -1.46 | 0.147 | -9.766709            | 1.483332  |
| _IWorryscor_1             | -7.928614 | 3.372201  | -2.35 | 0.020 | -14.61086            | -1.246373 |
| _ICenXWor_1_1             | 9.765665  | 3.668966  | 2.66  | 0.009 | 2.495363             | 17.03597  |
| _Itrat_1                  | -3.536373 | 5.514778  | -0.64 | 0.523 | -14.46427            | 7.391528  |
| WAIS_WMDigitBack          | -.8760398 | .5534741  | -1.58 | 0.116 | -1.972786            | .2207061  |
| _ItreXWAIS_1              | -.6588879 | .8847844  | -0.74 | 0.458 | -2.412147            | 1.094371  |
| _cons                     | 22.61717  | 10.22082  | 2.21  | 0.029 | 2.363928             | 42.87041  |

```
. xi: regress WorryMainMeasure_8WEEK WorryMainMeasure_Baseline i.Centre*i.Worryscorestrata
i.treat*WAIS_WMLetter
i.Centre           _ICentre_0-1           (naturally coded; _ICentre_0 omitted)
i.Worryscores~a   _IWorryscor_0-1       (naturally coded; _IWorryscor_0 omitted)
i.Cen~e*i.Wor~a   _ICenXWor_#_#           (coded as above)
i.treat           _Itrat_0-1           (naturally coded; _Itrat_0 omitted)
i.treat*WAIS_~r   _ItreXWAIS_#         (coded as above)
```

|          |  |            |     |            |                 |          |
|----------|--|------------|-----|------------|-----------------|----------|
| Source   |  | SS         | df  | MS         | Number of obs = | 119      |
| -----    |  |            |     |            | F( 7, 111) =    | 9.31     |
| Model    |  | 6282.76755 | 7   | 897.538221 | Prob > F        | = 0.0000 |
| Residual |  | 10705.0812 | 111 | 96.4421729 | R-squared       | = 0.3698 |
| -----    |  |            |     |            | Adj R-squared = | 0.3301   |
| Total    |  | 16987.8487 | 118 | 143.96482  | Root MSE        | = 9.8205 |

| WorryMainMeasure_8WEEK    | Coef.     | Std. Err. | t     | P> t  | [95% Conf. Interval] |           |
|---------------------------|-----------|-----------|-------|-------|----------------------|-----------|
| WorryMainMeasure_Baseline | .7433942  | .1628841  | 4.56  | 0.000 | .4206284             | 1.06616   |
| _ICentre_1                | -4.035702 | 2.905079  | -1.39 | 0.168 | -9.79231             | 1.720907  |
| _IWorryscor_1             | -7.541349 | 3.453019  | -2.18 | 0.031 | -14.38374            | -.6989618 |
| _ICenXWor_1_1             | 9.122654  | 3.740799  | 2.44  | 0.016 | 1.710011             | 16.5353   |
| _Itrat_1                  | -3.229379 | 5.026677  | -0.64 | 0.522 | -13.19008            | 6.731318  |
| WAIS_WMLetter             | -.1250086 | .3757401  | -0.33 | 0.740 | -.8695627            | .6195455  |
| _ItreXWAIS_1              | -.4989435 | .5608095  | -0.89 | 0.376 | -1.610225            | .612338   |
| _cons                     | 18.05084  | 10.31926  | 1.75  | 0.083 | -2.397465            | 38.49913  |

```
. xi: regress WorryMainMeasure_8WEEK WorryMainMeasure_Baseline i.Centre*i.Worryscorestrata
i.treat*Beads_60
i.Centre           _ICentre_0-1           (naturally coded; _ICentre_0 omitted)
i.Worryscores~a   _IWorryscor_0-1       (naturally coded; _IWorryscor_0 omitted)
i.Cen~e*i.Wor~a   _ICenXWor_#_#           (coded as above)
i.treat           _Itrat_0-1           (naturally coded; _Itrat_0 omitted)
i.treat*Bead~60   _ItreXBeads_#         (coded as above)
```

|          |  |            |     |            |                 |          |
|----------|--|------------|-----|------------|-----------------|----------|
| Source   |  | SS         | df  | MS         | Number of obs = | 117      |
| -----    |  |            |     |            | F( 7, 109) =    | 9.81     |
| Model    |  | 6427.66055 | 7   | 918.237221 | Prob > F        | = 0.0000 |
| Residual |  | 10197.4847 | 109 | 93.554906  | R-squared       | = 0.3866 |
| -----    |  |            |     |            | Adj R-squared = | 0.3472   |
| Total    |  | 16625.1453 | 116 | 143.320218 | Root MSE        | = 9.6724 |

| WorryMainMeasure_8WEEK    | Coef.     | Std. Err. | t     | P> t  | [95% Conf. Interval] |           |
|---------------------------|-----------|-----------|-------|-------|----------------------|-----------|
| WorryMainMeasure_Baseline | .7484991  | .1635685  | 4.58  | 0.000 | .4243117             | 1.072687  |
| _ICentre_1                | -3.338045 | 2.890597  | -1.15 | 0.251 | -9.067115            | 2.391025  |
| _IWorryscor_1             | -6.949771 | 3.498286  | -1.99 | 0.049 | -13.88326            | -.0162819 |
| _ICenXWor_1_1             | 8.826724  | 3.720374  | 2.37  | 0.019 | 1.453065             | 16.20038  |
| _Itrat_1                  | -5.490553 | 2.954342  | -1.86 | 0.066 | -11.34596            | .3648557  |
| Beads_60                  | -.146222  | .2067636  | -0.71 | 0.481 | -.5560208            | .2635767  |
| _ItreXBeads_1             | -.2985223 | .3135996  | -0.95 | 0.343 | -.9200666            | .3230219  |
| _cons                     | 17.21508  | 9.184493  | 1.87  | 0.064 | -.9882917            | 35.41844  |

```
. xi: regress WorryMainMeasure_8WEEK WorryMainMeasure_Baseline i.Centre*i.Worryscorestrata
i.treat*IPQ_CureControl
i.Centre           _ICentre_0-1           (naturally coded; _ICentre_0 omitted)
```

```

i.Worryscores~a      _IWorryscor_0-1      (naturally coded; _IWorryscor_0 omitted)
i.Cen~e*i.Wor~a      _ICenXWor_#_#        (coded as above)
i.treat              _Itreat_0-1          (naturally coded; _Itreat_0 omitted)
i.treat*IPQ_C~1      _ItreXIPQ_C_#        (coded as above)

```

| Source   | SS         | df  | MS         | Number of obs = | 138    |
|----------|------------|-----|------------|-----------------|--------|
| Model    | 7130.70237 | 7   | 1018.67177 | F( 7, 130) =    | 10.82  |
| Residual | 12244.4643 | 130 | 94.1881869 | Prob > F =      | 0.0000 |
|          |            |     |            | R-squared =     | 0.3680 |
|          |            |     |            | Adj R-squared = | 0.3340 |
|          |            |     |            | Root MSE =      | 9.7051 |

| WorryMainMeasure_8WEEK    | Coef.     | Std. Err. | t     | P> t  | [95% Conf. Interval] |
|---------------------------|-----------|-----------|-------|-------|----------------------|
| WorryMainMeasure_Baseline | .7195155  | .1527749  | 4.71  | 0.000 | .4172686 1.021762    |
| _ICentre_1                | -5.117838 | 2.617487  | -1.96 | 0.053 | -10.29622 .0605481   |
| _IWorryscor_1             | -6.620646 | 3.255519  | -2.03 | 0.044 | -13.0613 -.1799901   |
| _ICenXWor_1_1             | 10.2633   | 3.385116  | 3.03  | 0.003 | 3.566251 16.96034    |
| _Itreat_1                 | -8.982053 | 6.436687  | -1.40 | 0.165 | -21.71627 3.752162   |
| IPQ_CureControl           | -.0320849 | .1796816  | -0.18 | 0.859 | -.3875634 .3233935   |
| _ItreXIPQ_C_1             | .114813   | .2687476  | 0.43  | 0.670 | -.416872 .6464979    |
| _cons                     | 18.32714  | 9.135661  | 2.01  | 0.047 | .253331 36.40095     |

```

. xi: regress WorryMainMeasure_8WEEK WorryMainMeasure_Baseline i.Centre*i.Worryscorestrata
i.treat*IPQ_Timeline
i.Centre      _ICentre_0-1      (naturally coded; _ICentre_0 omitted)
i.Worryscores~a      _IWorryscor_0-1      (naturally coded; _IWorryscor_0 omitted)
i.Cen~e*i.Wor~a      _ICenXWor_#_#        (coded as above)
i.treat        _Itreat_0-1          (naturally coded; _Itreat_0 omitted)
i.treat*IPQ_T~e      _ItreXIPQ_T_#        (coded as above)

```

| Source   | SS         | df  | MS         | Number of obs = | 138    |
|----------|------------|-----|------------|-----------------|--------|
| Model    | 7286.91541 | 7   | 1040.98792 | F( 7, 130) =    | 11.20  |
| Residual | 12088.2513 | 130 | 92.9865481 | Prob > F =      | 0.0000 |
|          |            |     |            | R-squared =     | 0.3761 |
|          |            |     |            | Adj R-squared = | 0.3425 |
|          |            |     |            | Root MSE =      | 9.643  |

| WorryMainMeasure_8WEEK    | Coef.     | Std. Err. | t     | P> t  | [95% Conf. Interval] |
|---------------------------|-----------|-----------|-------|-------|----------------------|
| WorryMainMeasure_Baseline | .6991287  | .1508308  | 4.64  | 0.000 | .400728 .9975294     |
| _ICentre_1                | -5.097053 | 2.571439  | -1.98 | 0.050 | -10.18434 -.0097689  |
| _IWorryscor_1             | -6.549974 | 3.231566  | -2.03 | 0.045 | -12.94324 -.1567067  |
| _ICenXWor_1_1             | 9.820496  | 3.379697  | 2.91  | 0.004 | 3.13417 16.50682     |
| _Itreat_1                 | -4.762367 | 5.057202  | -0.94 | 0.348 | -14.76744 5.242702   |
| IPQ_Timeline              | -.3494616 | .4696164  | -0.74 | 0.458 | -1.278542 .5796183   |
| _ItreXIPQ_T_1             | -.2747424 | .6916976  | -0.40 | 0.692 | -1.643183 1.093699   |
| _cons                     | 21.53404  | 9.59767   | 2.24  | 0.027 | 2.546194 40.52188    |

```

. xi: regress WorryMainMeasure_8WEEK WorryMainMeasure_Baseline i.Centre*i.Worryscorestrata
i.treat*IPQ_StateOfMind
i.Centre      _ICentre_0-1      (naturally coded; _ICentre_0 omitted)
i.Worryscores~a      _IWorryscor_0-1      (naturally coded; _IWorryscor_0 omitted)
i.Cen~e*i.Wor~a      _ICenXWor_#_#        (coded as above)
i.treat        _Itreat_0-1          (naturally coded; _Itreat_0 omitted)
i.treat*IPQ_S~d      _ItreXIPQ_S_#        (coded as above)

```

| Source   | SS         | df  | MS         | Number of obs = | 138    |
|----------|------------|-----|------------|-----------------|--------|
| Model    | 7159.13857 | 7   | 1022.73408 | F( 7, 130) =    | 10.88  |
| Residual | 12216.0281 | 130 | 93.9694469 | Prob > F =      | 0.0000 |
|          |            |     |            | R-squared =     | 0.3695 |
|          |            |     |            | Adj R-squared = | 0.3356 |
|          |            |     |            | Root MSE =      | 9.6938 |

| WorryMainMeasure_8WEEK    | Coef.     | Std. Err. | t     | P> t  | [95% Conf. Interval] |
|---------------------------|-----------|-----------|-------|-------|----------------------|
| WorryMainMeasure_Baseline | .7239716  | .150976   | 4.80  | 0.000 | .4252836 1.02266     |
| _ICentre_1                | -5.324464 | 2.584219  | -2.06 | 0.041 | -10.43703 -.2118962  |
| _IWorryscor_1             | -6.547808 | 3.262877  | -2.01 | 0.047 | -13.00302 -.0925954  |
| _ICenXWor_1_1             | 10.4515   | 3.416232  | 3.06  | 0.003 | 3.692893 17.2101     |
| _Itreat_1                 | -7.369983 | 4.084755  | -1.80 | 0.074 | -15.45118 .7112164   |
| IPQ_StateOfMind           | .3153761  | .9576468  | 0.33  | 0.742 | -1.579214 2.209966   |

|               |  |          |          |      |       |           |          |
|---------------|--|----------|----------|------|-------|-----------|----------|
| _ItreXIPQ_S_1 |  | .4555964 | 1.57891  | 0.29 | 0.773 | -2.668089 | 3.579281 |
| _cons         |  | 16.53642 | 8.906208 | 1.86 | 0.066 | -1.083449 | 34.15629 |

```
. xi: regress WorryMainMeasure_8WEEK WorryMainMeasure_Baseline i.Centre*i.Worryscorestrata
i.treat*IPQ_Personality
i.Centre      _ICentre_0-1      (naturally coded; _ICentre_0 omitted)
i.Worryscores~a _IWorryscor_0-1  (naturally coded; _IWorryscor_0 omitted)
i.Cen~e*i.Wor~a _ICenXWor_#_#      (coded as above)
i.treat      _Itreat_0-1      (naturally coded; _Itreat_0 omitted)
i.treat*IPQ_P~y _ItreXIPQ_P_#      (coded as above)
```

|          |  |            |     |            |                 |        |
|----------|--|------------|-----|------------|-----------------|--------|
| Source   |  | SS         | df  | MS         | Number of obs = | 138    |
| Model    |  | 7250.35978 | 7   | 1035.76568 | F( 7, 130) =    | 11.11  |
| Residual |  | 12124.8069 | 130 | 93.2677453 | Prob > F =      | 0.0000 |
| Total    |  | 19375.1667 | 137 | 141.424574 | R-squared =     | 0.3742 |
|          |  |            |     |            | Adj R-squared = | 0.3405 |
|          |  |            |     |            | Root MSE =      | 9.6575 |

| WorryMainMeasure_8WEEK    |  | Coef.     | Std. Err. | t     | P> t  | [95% Conf. Interval] |
|---------------------------|--|-----------|-----------|-------|-------|----------------------|
| WorryMainMeasure_Baseline |  | .7160616  | .1503656  | 4.76  | 0.000 | .4185813 1.013542    |
| _ICentre_1                |  | -4.956731 | 2.59259   | -1.91 | 0.058 | -10.08586 .1723979   |
| _IWorryscor_1             |  | -6.195385 | 3.257331  | -1.90 | 0.059 | -12.63962 .2488551   |
| _ICenXWor_1_1             |  | 10.08057  | 3.360864  | 3.00  | 0.003 | 3.431502 16.72964    |
| _Itreat_1                 |  | -10.5947  | 3.940967  | -2.69 | 0.008 | -18.39143 -2.797965  |
| IPQ_Personality           |  | -.6492905 | .9487172  | -0.68 | 0.495 | -2.526214 1.227633   |
| _ItreXIPQ_P_1             |  | 1.599144  | 1.338724  | 1.19  | 0.234 | -1.049362 4.24765    |
| _cons                     |  | 19.29075  | 9.020608  | 2.14  | 0.034 | 1.444555 37.13694    |

```
. xi: regress WorryMainMeasure_8WEEK WorryMainMeasure_Baseline i.Centre*i.Worryscorestrata
i.treat*MAP_AlcoholDays
i.Centre      _ICentre_0-1      (naturally coded; _ICentre_0 omitted)
i.Worryscores~a _IWorryscor_0-1  (naturally coded; _IWorryscor_0 omitted)
i.Cen~e*i.Wor~a _ICenXWor_#_#      (coded as above)
i.treat      _Itreat_0-1      (naturally coded; _Itreat_0 omitted)
i.treat*MAP_A~s _ItreXMAP_A_#      (coded as above)
```

|          |  |            |     |            |                 |        |
|----------|--|------------|-----|------------|-----------------|--------|
| Source   |  | SS         | df  | MS         | Number of obs = | 143    |
| Model    |  | 7279.03735 | 7   | 1039.86248 | F( 7, 135) =    | 11.29  |
| Residual |  | 12434.7109 | 135 | 92.1089696 | Prob > F =      | 0.0000 |
| Total    |  | 19713.7483 | 142 | 138.829213 | R-squared =     | 0.3692 |
|          |  |            |     |            | Adj R-squared = | 0.3365 |
|          |  |            |     |            | Root MSE =      | 9.5973 |

| WorryMainMeasure_8WEEK    |  | Coef.     | Std. Err. | t     | P> t  | [95% Conf. Interval] |
|---------------------------|--|-----------|-----------|-------|-------|----------------------|
| WorryMainMeasure_Baseline |  | .7327269  | .1516608  | 4.83  | 0.000 | .4327884 1.032665    |
| _ICentre_1                |  | -5.040735 | 2.487915  | -2.03 | 0.045 | -9.961065 -.120404   |
| _IWorryscor_1             |  | -6.652192 | 3.237715  | -2.05 | 0.042 | -13.0554 -.2489873   |
| _ICenXWor_1_1             |  | 10.05986  | 3.289717  | 3.06  | 0.003 | 3.553807 16.5659     |
| _Itreat_1                 |  | -5.069484 | 1.920556  | -2.64 | 0.009 | -8.867752 -1.271215  |
| MAP_AlcoholDays           |  | .1452168  | .142439   | 1.02  | 0.310 | -.1364836 .4269173   |
| _ItreXMAP_A_1             |  | -.2411039 | .1980082  | -1.22 | 0.225 | -.6327032 .1504953   |
| _cons                     |  | 16.20357  | 8.817152  | 1.84  | 0.068 | -1.234048 33.64118   |

```
. xi: regress WorryMainMeasure_8WEEK WorryMainMeasure_Baseline i.Centre*i.Worryscorestrata
i.treat*MAP_AlcoholAmount
i.Centre      _ICentre_0-1      (naturally coded; _ICentre_0 omitted)
i.Worryscores~a _IWorryscor_0-1  (naturally coded; _IWorryscor_0 omitted)
i.Cen~e*i.Wor~a _ICenXWor_#_#      (coded as above)
i.treat      _Itreat_0-1      (naturally coded; _Itreat_0 omitted)
i.treat*MAP_A~t _ItreXMAP_A_#      (coded as above)
```

|          |  |            |     |            |                 |        |
|----------|--|------------|-----|------------|-----------------|--------|
| Source   |  | SS         | df  | MS         | Number of obs = | 143    |
| Model    |  | 7502.63233 | 7   | 1071.80462 | F( 7, 135) =    | 11.85  |
| Residual |  | 12211.1159 | 135 | 90.4527105 | Prob > F =      | 0.0000 |
| Total    |  | 19713.7483 | 142 | 138.829213 | R-squared =     | 0.3806 |
|          |  |            |     |            | Adj R-squared = | 0.3485 |
|          |  |            |     |            | Root MSE =      | 9.5107 |

| WorryMainMeasure_8WEEK |  | Coef. | Std. Err. | t | P> t | [95% Conf. Interval] |
|------------------------|--|-------|-----------|---|------|----------------------|
|------------------------|--|-------|-----------|---|------|----------------------|

```
-----+-----
```

|                           |  |           |          |       |       |           |           |
|---------------------------|--|-----------|----------|-------|-------|-----------|-----------|
| WorryMainMeasure_Baseline |  | .7273762  | .1472004 | 4.94  | 0.000 | .4362591  | 1.018493  |
| _ICentre_1                |  | -5.503111 | 2.478762 | -2.22 | 0.028 | -10.40534 | -.6008817 |
| _IWorryscor_1             |  | -6.727281 | 3.154036 | -2.13 | 0.035 | -12.96499 | -.4895689 |
| _ICenXWor_1_1             |  | 10.21867  | 3.237055 | 3.16  | 0.002 | 3.816772  | 16.62057  |
| _Itrateat_1               |  | -8.39172  | 1.89352  | -4.43 | 0.000 | -12.13652 | -4.64692  |
| MAP_AlcoholAmount         |  | -.1519055 | .1551586 | -0.98 | 0.329 | -.4587613 | -.1549504 |
| _ItreXMAP_A_1             |  | .4648569  | .2364311 | 1.97  | 0.051 | -.002731  | .9324448  |
| _cons                     |  | 18.13268  | 8.423811 | 2.15  | 0.033 | 1.472969  | 34.79238  |

```
-----+-----
```

```
. xi: regress WorryMainMeasure_8WEEK WorryMainMeasure_Baseline i.Centre*i.Worryscorestrata
i.treat*MAP_AlcoholPastYear
i.Centre          _ICentre_0-1          (naturally coded; _ICentre_0 omitted)
i.Worryscores~a  _IWorryscor_0-1      (naturally coded; _IWorryscor_0 omitted)
i.Cen~e*i.Wor~a  _ICenXWor_#_#          (coded as above)
i.treat          _Itrateat_0-1         (naturally coded; _Itrateat_0 omitted)
i.treat*MAP_A~r  _ItreXMAP_A_#         (coded as above)
```

```
-----+-----
```

|          |  |            |     |            |                 |        |
|----------|--|------------|-----|------------|-----------------|--------|
| Source   |  | SS         | df  | MS         | Number of obs = | 143    |
| Model    |  | 7189.17008 | 7   | 1027.0243  | F( 7, 135) =    | 11.07  |
| Residual |  | 12524.5782 | 135 | 92.7746531 | Prob > F =      | 0.0000 |
|          |  |            |     |            | R-squared =     | 0.3647 |
|          |  |            |     |            | Adj R-squared = | 0.3317 |
| Total    |  | 19713.7483 | 142 | 138.829213 | Root MSE =      | 9.632  |

```
-----+-----
```

```
-----+-----
```

|                           |  |           |           |       |       |                      |
|---------------------------|--|-----------|-----------|-------|-------|----------------------|
| WorryMainMeasure_8WEEK    |  | Coef.     | Std. Err. | t     | P> t  | [95% Conf. Interval] |
| WorryMainMeasure_Baseline |  | .7331931  | .1505972  | 4.87  | 0.000 | .4353582 1.031028    |
| _ICentre_1                |  | -5.332493 | 2.544259  | -2.10 | 0.038 | -10.36425 -3.007314  |
| _IWorryscor_1             |  | -6.699209 | 3.251047  | -2.06 | 0.041 | -13.12878 -2.696379  |
| _ICenXWor_1_1             |  | 10.28744  | 3.343267  | 3.08  | 0.003 | 3.675491 16.8994     |
| _Itrateat_1               |  | -7.596878 | 2.918415  | -2.60 | 0.010 | -13.3686 -1.825152   |
| MAP_AlcoholPastYear       |  | .1485492  | 2.451442  | 0.06  | 0.952 | -4.699649 4.996747   |
| _ItreXMAP_A_1             |  | 1.774483  | 3.504981  | 0.51  | 0.613 | -5.157291 8.706257   |
| _cons                     |  | 16.94448  | 8.773248  | 1.93  | 0.056 | -.4063068 34.29526   |

```
-----+-----
```

```
. xi: regress WorryMainMeasure_8WEEK WorryMainMeasure_Baseline i.Centre*i.Worryscorestrata
i.treat*Cannabis_pastmonth
i.Centre          _ICentre_0-1          (naturally coded; _ICentre_0 omitted)
i.Worryscores~a  _IWorryscor_0-1      (naturally coded; _IWorryscor_0 omitted)
i.Cen~e*i.Wor~a  _ICenXWor_#_#          (coded as above)
i.treat          _Itrateat_0-1         (naturally coded; _Itrateat_0 omitted)
i.treat*Canna~h  _ItreXCanna_#         (coded as above)
```

```
-----+-----
```

|          |  |            |     |            |                 |        |
|----------|--|------------|-----|------------|-----------------|--------|
| Source   |  | SS         | df  | MS         | Number of obs = | 143    |
| Model    |  | 7308.4868  | 7   | 1044.06954 | F( 7, 135) =    | 11.36  |
| Residual |  | 12405.2615 | 135 | 91.8908256 | Prob > F =      | 0.0000 |
|          |  |            |     |            | R-squared =     | 0.3707 |
|          |  |            |     |            | Adj R-squared = | 0.3381 |
| Total    |  | 19713.7483 | 142 | 138.829213 | Root MSE =      | 9.586  |

```
-----+-----
```

```
-----+-----
```

|                           |  |           |           |       |       |                      |
|---------------------------|--|-----------|-----------|-------|-------|----------------------|
| WorryMainMeasure_8WEEK    |  | Coef.     | Std. Err. | t     | P> t  | [95% Conf. Interval] |
| WorryMainMeasure_Baseline |  | .7492769  | .1512166  | 4.95  | 0.000 | .4502169 1.048337    |
| _ICentre_1                |  | -5.348775 | 2.497167  | -2.14 | 0.034 | -10.2874 -4.4101476  |
| _IWorryscor_1             |  | -7.180646 | 3.273906  | -2.19 | 0.030 | -13.65542 -7.058673  |
| _ICenXWor_1_1             |  | 10.59209  | 3.302054  | 3.21  | 0.002 | 4.061645 17.12254    |
| _Itrateat_1               |  | -6.172686 | 1.678744  | -3.68 | 0.000 | -9.492726 -2.852647  |
| Cannabis_pastmonth        |  | 4.473347  | 3.84382   | 1.16  | 0.247 | -3.128546 12.07524   |
| _ItreXCanna_1             |  | -1.065392 | 5.903219  | -0.18 | 0.857 | -12.74014 10.60936   |
| _cons                     |  | 15.77604  | 8.62988   | 1.83  | 0.070 | -1.291208 32.84328   |

```
-----+-----
```

```
. xi: regress WorryMainMeasure_8WEEK WorryMainMeasure_Baseline i.Centre*i.Worryscorestrata
i.treat*CannabisPastYear
i.Centre          _ICentre_0-1          (naturally coded; _ICentre_0 omitted)
i.Worryscores~a  _IWorryscor_0-1      (naturally coded; _IWorryscor_0 omitted)
i.Cen~e*i.Wor~a  _ICenXWor_#_#          (coded as above)
i.treat          _Itrateat_0-1         (naturally coded; _Itrateat_0 omitted)
i.treat*Canna~r  _ItreXCanna_#         (coded as above)
```

```
-----+-----
```

|        |  |    |    |    |                 |       |
|--------|--|----|----|----|-----------------|-------|
| Source |  | SS | df | MS | Number of obs = | 143   |
|        |  |    |    |    | F( 7, 135) =    | 11.10 |

|          |  |            |     |            |               |   |        |
|----------|--|------------|-----|------------|---------------|---|--------|
| Model    |  | 7201.25242 | 7   | 1028.75035 | Prob > F      | = | 0.0000 |
| Residual |  | 12512.4958 | 135 | 92.6851543 | R-squared     | = | 0.3653 |
| -----+   |  |            |     |            | Adj R-squared | = | 0.3324 |
| Total    |  | 19713.7483 | 142 | 138.829213 | Root MSE      | = | 9.6273 |

| WorryMainMeasure_8WEEK    | Coef.      | Std. Err. | t     | P> t  | [95% Conf. Interval] |           |
|---------------------------|------------|-----------|-------|-------|----------------------|-----------|
| WorryMainMeasure_Baseline | .7320765   | .1501001  | 4.88  | 0.000 | .4352248             | 1.028928  |
| _ICentre_1                | -5.272067  | 2.514703  | -2.10 | 0.038 | -10.24538            | -.2987594 |
| _IWorryscor_1             | -6.709383  | 3.231571  | -2.08 | 0.040 | -13.10044            | -.3183309 |
| _ICenXWor_1_1             | 10.2785    | 3.306332  | 3.11  | 0.002 | 3.739592             | 16.81741  |
| _Itrateat_1               | -6.348954  | 1.725591  | -3.68 | 0.000 | -9.761642            | -2.936266 |
| CannabisPastYear          | 2.110701   | 3.457106  | 0.61  | 0.543 | -4.726391            | 8.947792  |
| _ItreXCanna_1             | -1.1123098 | 4.867421  | -0.02 | 0.982 | -9.738571            | 9.513952  |
| _cons                     | 16.83717   | 8.587068  | 1.96  | 0.052 | -.1454125            | 33.81974  |

```
. xi: regress WorryMainMeasure_8WEEK WorryMainMeasure_Baseline i.Centre*i.Worryscorestrata
i.treat*IllicitDrugs_pastmonth
i.Centre           _ICentre_0-1           (naturally coded; _ICentre_0 omitted)
i.Worryscores~a   _IWorryscor_0-1       (naturally coded; _IWorryscor_0 omitted)
i.Cen~e*i.Wor~a   _ICenXWor_#_#           (coded as above)
i.treat           _Itrateat_0-1         (naturally coded; _Itrateat_0 omitted)
i.treat*Illici~h  _ItreXIllici_#       (coded as above)
```

|          |  |            |     |            |                 |          |
|----------|--|------------|-----|------------|-----------------|----------|
| Source   |  | SS         | df  | MS         | Number of obs = | 143      |
| -----+   |  |            |     |            | F( 7, 135) =    | 11.17    |
| Model    |  | 7229.5317  | 7   | 1032.79024 | Prob > F        | = 0.0000 |
| Residual |  | 12484.2165 | 135 | 92.4756781 | R-squared       | = 0.3667 |
| -----+   |  |            |     |            | Adj R-squared = | 0.3339   |
| Total    |  | 19713.7483 | 142 | 138.829213 | Root MSE        | = 9.6164 |

| WorryMainMeasure_8WEEK    | Coef.     | Std. Err. | t     | P> t  | [95% Conf. Interval] |           |
|---------------------------|-----------|-----------|-------|-------|----------------------|-----------|
| WorryMainMeasure_Baseline | .7359611  | .1511236  | 4.87  | 0.000 | .4370852             | 1.034837  |
| _ICentre_1                | -5.16578  | 2.49827   | -2.07 | 0.041 | -10.10659            | -.2249709 |
| _IWorryscor_1             | -6.715757 | 3.272242  | -2.05 | 0.042 | -13.18725            | -.2442684 |
| _ICenXWor_1_1             | 10.15477  | 3.278884  | 3.10  | 0.002 | 3.670151             | 16.6394   |
| _Itrateat_1               | -6.813654 | 1.678253  | -4.06 | 0.000 | -10.13272            | -3.494586 |
| IllicitDrugs_pastmonth    | -2.134091 | 4.526605  | -0.47 | 0.638 | -11.08632            | 6.818141  |
| _ItreXIllici_1            | 5.791932  | 6.102017  | 0.95  | 0.344 | -6.27598             | 17.85984  |
| _cons                     | 16.98075  | 8.608569  | 1.97  | 0.051 | -.0443495            | 34.00585  |

```
. xi: regress WorryMainMeasure_8WEEK WorryMainMeasure_Baseline i.Centre*i.Worryscorestrata
i.treat*IllicitDrugs_PastYear
i.Centre           _ICentre_0-1           (naturally coded; _ICentre_0 omitted)
i.Worryscores~a   _IWorryscor_0-1       (naturally coded; _IWorryscor_0 omitted)
i.Cen~e*i.Wor~a   _ICenXWor_#_#           (coded as above)
i.treat           _Itrateat_0-1         (naturally coded; _Itrateat_0 omitted)
i.treat*Illic~r   _ItreXIllic_#       (coded as above)
```

|          |  |            |     |            |                 |          |
|----------|--|------------|-----|------------|-----------------|----------|
| Source   |  | SS         | df  | MS         | Number of obs = | 143      |
| -----+   |  |            |     |            | F( 7, 135) =    | 11.57    |
| Model    |  | 7390.77592 | 7   | 1055.82513 | Prob > F        | = 0.0000 |
| Residual |  | 12322.9723 | 135 | 91.2812765 | R-squared       | = 0.3749 |
| -----+   |  |            |     |            | Adj R-squared = | 0.3425   |
| Total    |  | 19713.7483 | 142 | 138.829213 | Root MSE        | = 9.5541 |

| WorryMainMeasure_8WEEK    | Coef.     | Std. Err. | t     | P> t  | [95% Conf. Interval] |           |
|---------------------------|-----------|-----------|-------|-------|----------------------|-----------|
| WorryMainMeasure_Baseline | .7209355  | .1480274  | 4.87  | 0.000 | .4281829             | 1.013688  |
| _ICentre_1                | -5.206565 | 2.478714  | -2.10 | 0.038 | -10.1087             | -.304431  |
| _IWorryscor_1             | -6.03453  | 3.180208  | -1.90 | 0.060 | -12.324              | .2549434  |
| _ICenXWor_1_1             | 9.816471  | 3.247798  | 3.02  | 0.003 | 3.393327             | 16.23962  |
| _Itrateat_1               | -7.230604 | 1.714159  | -4.22 | 0.000 | -10.62068            | -3.840525 |
| IllicitDrugs_PastYear     | -5.661141 | 3.626463  | -1.56 | 0.121 | -12.83317            | 1.510887  |
| _ItreXIllic_1             | 7.511976  | 4.868654  | 1.54  | 0.125 | -2.116724            | 17.14068  |
| _cons                     | 18.14832  | 8.457564  | 2.15  | 0.034 | 1.421864             | 34.87478  |

```
. xi: regress WorryMainMeasure_8WEEK WorryMainMeasure_Baseline i.Centre*i.Worryscorestrata
i.treat*age
i.Centre           _ICentre_0-1           (naturally coded; _ICentre_0 omitted)
```

```

i.Worryscores~a      _IWorryscor_0-1      (naturally coded; _IWorryscor_0 omitted)
i.Cen~e*i.Wor~a     _ICenXWor_#_#         (coded as above)
i.treat              _Itreat_0-1          (naturally coded; _Itreat_0 omitted)
i.treat*age          _ItreXage_#          (coded as above)

```

| Source   | SS         | df  | MS         | Number of obs = | 143    |
|----------|------------|-----|------------|-----------------|--------|
| Model    | 7180.78426 | 7   | 1025.82632 | F( 7, 135) =    | 11.05  |
| Residual | 12532.964  | 135 | 92.8367703 | Prob > F =      | 0.0000 |
|          |            |     |            | R-squared =     | 0.3643 |
|          |            |     |            | Adj R-squared = | 0.3313 |
|          |            |     |            | Root MSE =      | 9.6352 |

| WorryMainMeasure_8WEEK    | Coef.     | Std. Err. | t     | P> t  | [95% Conf. Interval] |          |
|---------------------------|-----------|-----------|-------|-------|----------------------|----------|
| WorryMainMeasure_Baseline | .7244206  | .1497716  | 4.84  | 0.000 | .4282184             | 1.020623 |
| _ICentre_1                | -4.997177 | 2.5011    | -2.00 | 0.048 | -9.943584            | -.05077  |
| _IWorryscor_1             | -6.341879 | 3.233349  | -1.96 | 0.052 | -12.73645            | .0526905 |
| _ICenXWor_1_1             | 9.888898  | 3.272711  | 3.02  | 0.003 | 3.416483             | 16.36131 |
| _Itreat_1                 | -2.261062 | 6.26908   | -0.36 | 0.719 | -14.65937            | 10.13725 |
| age                       | .0328393  | .0950625  | 0.35  | 0.730 | -.1551651            | .2208436 |
| _ItreXage_1               | -.0985558 | .1455774  | -0.68 | 0.500 | -.3864631            | .1893514 |
| _cons                     | 15.96106  | 9.487002  | 1.68  | 0.095 | -2.801315            | 34.72343 |

```

. xi: regress WorryMainMeasure_8WEEK WorryMainMeasure_Baseline i.Centre*i.Worryscorestrata
i.treat*sex
i.Centre      _ICentre_0-1      (naturally coded; _ICentre_0 omitted)
i.Worryscores~a _IWorryscor_0-1      (naturally coded; _IWorryscor_0 omitted)
i.Cen~e*i.Wor~a _ICenXWor_#_#         (coded as above)
i.treat       _Itreat_0-1          (naturally coded; _Itreat_0 omitted)
i.treat*sex   _ItreXsex_#          (coded as above)

```

| Source   | SS         | df  | MS         | Number of obs = | 143    |
|----------|------------|-----|------------|-----------------|--------|
| Model    | 7375.89899 | 7   | 1053.69986 | F( 7, 135) =    | 11.53  |
| Residual | 12337.8493 | 135 | 91.391476  | Prob > F =      | 0.0000 |
|          |            |     |            | R-squared =     | 0.3742 |
|          |            |     |            | Adj R-squared = | 0.3417 |
|          |            |     |            | Root MSE =      | 9.5599 |

| WorryMainMeasure_8WEEK    | Coef.     | Std. Err. | t     | P> t  | [95% Conf. Interval] |           |
|---------------------------|-----------|-----------|-------|-------|----------------------|-----------|
| WorryMainMeasure_Baseline | .7033765  | .1486572  | 4.73  | 0.000 | .4093783             | .9973747  |
| _ICentre_1                | -5.212224 | 2.48262   | -2.10 | 0.038 | -10.12208            | -.3023663 |
| _IWorryscor_1             | -5.787171 | 3.175508  | -1.82 | 0.071 | -12.06735            | .4930056  |
| _ICenXWor_1_1             | 9.351654  | 3.271384  | 2.86  | 0.005 | 2.881863             | 15.82145  |
| _Itreat_1                 | .1855793  | 4.939858  | 0.04  | 0.970 | -9.58394             | 9.955099  |
| sex                       | .899063   | 2.278373  | 0.39  | 0.694 | -3.606857            | 5.404983  |
| _ItreXsex_1               | -4.650087 | 3.307989  | -1.41 | 0.162 | -11.19227            | 1.892097  |
| _cons                     | 17.38076  | 8.785147  | 1.98  | 0.050 | .006442              | 34.75508  |

```

. xi: regress WorryMainMeasure_8WEEK WorryMainMeasure_Baseline i.Centre*i.Worryscorestrata
i.treat*i.ethnicity
i.Centre      _ICentre_0-1      (naturally coded; _ICentre_0 omitted)
i.Worryscores~a _IWorryscor_0-1      (naturally coded; _IWorryscor_0 omitted)
i.Cen~e*i.Wor~a _ICenXWor_#_#         (coded as above)
i.treat       _Itreat_0-1          (naturally coded; _Itreat_0 omitted)
i.ethnicity   _Iethnicity_1-7      (naturally coded; _Iethnicity_1 omitted)
i.treat*i.eth~y _ItreXeth_#_#         (coded as above)
note: _ItreXeth_1_4 omitted because of collinearity
note: _ItreXeth_1_5 omitted because of collinearity

```

| Source   | SS         | df  | MS         | Number of obs = | 143    |
|----------|------------|-----|------------|-----------------|--------|
| Model    | 7216.98604 | 9   | 801.887337 | F( 9, 133) =    | 8.53   |
| Residual | 12496.7622 | 133 | 93.9606182 | Prob > F =      | 0.0000 |
|          |            |     |            | R-squared =     | 0.3661 |
|          |            |     |            | Adj R-squared = | 0.3232 |
|          |            |     |            | Root MSE =      | 9.6933 |

| WorryMainMeasure_8WEEK    | Coef.     | Std. Err. | t     | P> t  | [95% Conf. Interval] |          |
|---------------------------|-----------|-----------|-------|-------|----------------------|----------|
| WorryMainMeasure_Baseline | .6900266  | .1581292  | 4.36  | 0.000 | .3772531             | 1.0028   |
| _ICentre_1                | -4.820849 | 2.578237  | -1.87 | 0.064 | -9.920502            | .2788039 |
| _IWorryscor_1             | -5.938396 | 3.302857  | -1.80 | 0.074 | -12.47132            | .5945271 |

|               |  |           |           |       |       |           |           |
|---------------|--|-----------|-----------|-------|-------|-----------|-----------|
| _ICenXWor_1_1 |  | 9.750917  | 3.319708  | 2.94  | 0.004 | 3.184664  | 16.31717  |
| _Itreat_1     |  | -6.545156 | 1.70293   | -3.84 | 0.000 | -9.913485 | -3.176827 |
| _Iethnicity_4 |  | 4.966547  | 9.861888  | 0.50  | 0.615 | -14.53988 | 24.47298  |
| _Iethnicity_5 |  | -3.959816 | 6.045856  | -0.65 | 0.514 | -15.91828 | 7.998653  |
| _Iethnicity_7 |  | -.7413881 | 4.233942  | -0.18 | 0.861 | -9.115961 | 7.633184  |
| _ItreXeth_1_4 |  | 0         | (omitted) |       |       |           |           |
| _ItreXeth_1_5 |  | 0         | (omitted) |       |       |           |           |
| _ItreXeth_1_7 |  | -1.31466  | 7.155057  | -0.18 | 0.854 | -15.46709 | 12.83777  |
| _cons         |  | 19.52512  | 8.992451  | 2.17  | 0.032 | 1.738397  | 37.31184  |

```
. xi: regress WorryMainMeasure_8WEEK WorryMainMeasure_Baseline i.Centre*i.Worryscorestrata
i.treat*i.Diagnosis
```

```
i.Centre          _ICentre_0-1      (naturally coded; _ICentre_0 omitted)
i.Worryscores~a  _IWorryscor_0-1    (naturally coded; _IWorryscor_0 omitted)
i.Cen~e*i.Wor~a  _ICenXWor_#_#      (coded as above)
i.treat          _Itreat_0-1      (naturally coded; _Itreat_0 omitted)
i.Diagnosis      _IDiagnosis_1-4  (naturally coded; _IDiagnosis_1 omitted)
i.treat*i.Dia~s  _ItreXDia_#_#    (coded as above)
```

|          |  |            |     |            |                 |        |
|----------|--|------------|-----|------------|-----------------|--------|
| Source   |  | SS         | df  | MS         | Number of obs = | 143    |
| Model    |  | 7468.24691 | 11  | 678.931537 | F( 11, 131) =   | 7.26   |
| Residual |  | 12245.5013 | 131 | 93.4771095 | Prob > F =      | 0.0000 |
| Total    |  | 19713.7483 | 142 | 138.829213 | R-squared =     | 0.3788 |
|          |  |            |     |            | Adj R-squared = | 0.3267 |
|          |  |            |     |            | Root MSE =      | 9.6684 |

| WorryMainMeasure_8WEEK    |  | Coef.     | Std. Err. | t     | P> t  | [95% Conf. Interval] |
|---------------------------|--|-----------|-----------|-------|-------|----------------------|
| WorryMainMeasure_Baseline |  | .6829027  | .1548727  | 4.41  | 0.000 | .3765276 .9892779    |
| _ICentre_1                |  | -5.307296 | 2.556888  | -2.08 | 0.040 | -10.36543 -.2491626  |
| _IWorryscor_1             |  | -6.064382 | 3.241321  | -1.87 | 0.064 | -12.47649 .3477247   |
| _ICenXWor_1_1             |  | 9.633688  | 3.325954  | 2.90  | 0.004 | 3.054157 16.21322    |
| _Itreat_1                 |  | -6.02356  | 1.88947   | -3.19 | 0.002 | -9.761381 -2.285738  |
| _IDiagnosis_2             |  | 5.85658   | 4.337733  | 1.35  | 0.179 | -2.724489 14.43765   |
| _IDiagnosis_3             |  | -1.553311 | 4.635186  | -0.34 | 0.738 | -10.72281 7.616192   |
| _IDiagnosis_4             |  | -.1919556 | 3.271166  | -0.06 | 0.953 | -6.663103 6.279192   |
| _ItreXDia_1_2             |  | -2.8297   | 6.285178  | -0.45 | 0.653 | -15.26328 9.603882   |
| _ItreXDia_1_3             |  | -4.006323 | 7.330631  | -0.55 | 0.586 | -18.50806 10.49541   |
| _ItreXDia_1_4             |  | .7306963  | 5.336455  | 0.14  | 0.891 | -9.826085 11.28748   |
| _cons                     |  | 19.76593  | 8.741849  | 2.26  | 0.025 | 2.472471 37.0594     |

```
. xi: regress WorryMainMeasure_8WEEK WorryMainMeasure_Baseline i.Centre*i.Worryscorestrata
i.treat*i.Employment
```

```
i.Centre          _ICentre_0-1      (naturally coded; _ICentre_0 omitted)
i.Worryscores~a  _IWorryscor_0-1    (naturally coded; _IWorryscor_0 omitted)
i.Cen~e*i.Wor~a  _ICenXWor_#_#      (coded as above)
i.treat          _Itreat_0-1      (naturally coded; _Itreat_0 omitted)
i.Employment     _IEmploymen_1-7  (naturally coded; _IEmploymen_1 omitted)
i.treat*i.Emp~t  _ItreXEmp_#_#    (coded as above)
note: _ItreXEmp_1_6 omitted because of collinearity
```

|          |  |            |     |            |                 |        |
|----------|--|------------|-----|------------|-----------------|--------|
| Source   |  | SS         | df  | MS         | Number of obs = | 143    |
| Model    |  | 8343.64941 | 16  | 521.478088 | F( 16, 126) =   | 5.78   |
| Residual |  | 11370.0988 | 126 | 90.2388797 | Prob > F =      | 0.0000 |
| Total    |  | 19713.7483 | 142 | 138.829213 | R-squared =     | 0.4232 |
|          |  |            |     |            | Adj R-squared = | 0.3500 |
|          |  |            |     |            | Root MSE =      | 9.4994 |

| WorryMainMeasure_8WEEK    |  | Coef.     | Std. Err. | t     | P> t  | [95% Conf. Interval] |          |
|---------------------------|--|-----------|-----------|-------|-------|----------------------|----------|
| WorryMainMeasure_Baseline |  | .7081324  | .1524823  | 4.64  | 0.000 | .4063744 1.00989     |          |
| _ICentre_1                |  | -4.851919 | 2.526512  | -1.92 | 0.057 | -9.851812 .1479732   |          |
| _IWorryscor_1             |  | -5.77886  | 3.390416  | -1.70 | 0.091 | -12.48839 .9306732   |          |
| _ICenXWor_1_1             |  | 8.244526  | 3.376393  | 2.44  | 0.016 | 1.562743 14.92631    |          |
| _Itreat_1                 |  | -7.881353 | 6.32116   | -1.25 | 0.215 | -20.39074 4.628038   |          |
| _IEmploymen_2             |  | 2.477022  | 5.123168  | 0.48  | 0.630 | -7.661577 12.61562   |          |
| _IEmploymen_3             |  | 2.659322  | 3.380241  | 0.79  | 0.433 | -4.030076 9.34872    |          |
| _IEmploymen_4             |  | -3.389954 | 4.922088  | -0.69 | 0.492 | -13.13062 6.350713   |          |
| _IEmploymen_5             |  | -3.424215 | 10.12133  | -0.34 | 0.736 | -23.45403 16.6056    |          |
| _IEmploymen_6             |  | -3.472681 | 8.023905  | -0.43 | 0.666 | -19.35175 12.40639   |          |
| _IEmploymen_7             |  | -6.272983 | 7.408204  | -0.85 | 0.399 | -20.9336             | 8.387636 |
| _ItreXEmp_1_2             |  | -5.795092 | 8.247389  | -0.70 | 0.484 | -22.11643 10.52625   |          |
| _ItreXEmp_1_3             |  | 1.443819  | 6.621592  | 0.22  | 0.828 | -11.66012 14.54776   |          |



|               |  |          |             |      |       |           |          |
|---------------|--|----------|-------------|------|-------|-----------|----------|
| _ltreXEmp_1_4 |  | 11.23982 | 9.986547    | 1.13 | 0.263 | -8.523261 | 31.00291 |
| _ltreXEmp_1_5 |  | .4220149 | 14.85002    | 0.03 | 0.977 | -28.96574 | 29.80977 |
| _ltreXEmp_1_6 |  |          | 0 (omitted) |      |       |           |          |
| _ltreXEmp_1_7 |  | 25.38059 | 13.38611    | 1.90 | 0.060 | -1.110141 | 51.87131 |
| _cons         |  | 17.05007 | 9.373315    | 1.82 | 0.071 | -1.499447 | 35.59958 |

```
. xi: regress WorryMainMeasure_8WEEK WorryMainMeasure_Baseline i.Centre*i.Worryscorestrata
i.treat*WASI_IQ
i.Centre          _ICentre_0-1      (naturally coded; _ICentre_0 omitted)
i.Worryscores~a  _IWorryscor_0-1    (naturally coded; _IWorryscor_0 omitted)
i.Cen~e*i.Wor~a  _ICenXWor_#_#      (coded as above)
i.treat          _Itreat_0-1        (naturally coded; _Itreat_0 omitted)
i.treat*WASI_IQ  _ltreXWASI_#      (coded as above)
```

|          |  |            |     |            |                 |        |
|----------|--|------------|-----|------------|-----------------|--------|
| Source   |  | SS         | df  | MS         | Number of obs = | 133    |
| Model    |  | 6727.16998 | 7   | 961.024283 | F( 7, 125) =    | 10.88  |
| Residual |  | 11039.7623 | 125 | 88.3180988 | Prob > F =      | 0.0000 |
| Total    |  | 17766.9323 | 132 | 134.597972 | R-squared =     | 0.3786 |
|          |  |            |     |            | Adj R-squared = | 0.3438 |
|          |  |            |     |            | Root MSE =      | 9.3978 |

| WorryMainMeasure_8WEEK    |  | Coef.     | Std. Err. | t     | P> t  | [95% Conf. Interval] |
|---------------------------|--|-----------|-----------|-------|-------|----------------------|
| WorryMainMeasure_Baseline |  | .7391575  | .1490852  | 4.96  | 0.000 | .4440993 1.034216    |
| _ICentre_1                |  | -3.290818 | 2.599464  | -1.27 | 0.208 | -8.43548 1.853844    |
| _IWorryscor_1             |  | -6.986153 | 3.196374  | -2.19 | 0.031 | -13.31217 -.6601324  |
| _ICenXWor_1_1             |  | 9.152653  | 3.375555  | 2.71  | 0.008 | 2.472011 15.8333     |
| _Itreat_1                 |  | 10.44797  | 9.373177  | 1.11  | 0.267 | -8.102713 28.99865   |
| WASI_IQ                   |  | .0304555  | .064634   | 0.47  | 0.638 | -.0974633 .1583743   |
| _ltreXWASI_1              |  | -.1665328 | .0911905  | -1.83 | 0.070 | -.3470101 .0139444   |
| _cons                     |  | 12.83623  | 10.95979  | 1.17  | 0.244 | -8.854558 34.52702   |

```
. xi: regress WorryMainMeasure_8WEEK WorryMainMeasure_Baseline i.Centre*i.Worryscorestrata
i.treat*CPZ_equivalent_Baseline
i.Centre          _ICentre_0-1      (naturally coded; _ICentre_0 omitted)
i.Worryscores~a  _IWorryscor_0-1    (naturally coded; _IWorryscor_0 omitted)
i.Cen~e*i.Wor~a  _ICenXWor_#_#      (coded as above)
i.treat          _Itreat_0-1        (naturally coded; _Itreat_0 omitted)
i.treat*CPZ_e~e  _ltreXCPZ_e_#      (coded as above)
```

|          |  |            |     |            |                 |        |
|----------|--|------------|-----|------------|-----------------|--------|
| Source   |  | SS         | df  | MS         | Number of obs = | 142    |
| Model    |  | 7326.8253  | 7   | 1046.68933 | F( 7, 134) =    | 11.48  |
| Residual |  | 12215.6324 | 134 | 91.1614361 | Prob > F =      | 0.0000 |
| Total    |  | 19542.4577 | 141 | 138.598991 | R-squared =     | 0.3749 |
|          |  |            |     |            | Adj R-squared = | 0.3423 |
|          |  |            |     |            | Root MSE =      | 9.5478 |

| WorryMainMeasure_8WEEK    |  | Coef.     | Std. Err. | t     | P> t  | [95% Conf. Interval] |
|---------------------------|--|-----------|-----------|-------|-------|----------------------|
| WorryMainMeasure_Baseline |  | .7013734  | .1485477  | 4.72  | 0.000 | .4075719 .9951748    |
| _ICentre_1                |  | -5.507373 | 2.501936  | -2.20 | 0.029 | -10.45577 -.5589808  |
| _IWorryscor_1             |  | -5.620043 | 3.183086  | -1.77 | 0.080 | -11.91563 .675546    |
| _ICenXWor_1_1             |  | 10.27319  | 3.275597  | 3.14  | 0.002 | 3.794635 16.75175    |
| _Itreat_1                 |  | -7.076508 | 2.582715  | -2.74 | 0.007 | -12.18467 -1.968347  |
| CPZ_equivalent_Baseline   |  | .0017841  | .002667   | 0.67  | 0.505 | -.0034909 .007059    |
| _ltreXCPZ_e_1             |  | .0016025  | .0039435  | 0.41  | 0.685 | -.0061197 .009402    |
| _cons                     |  | 17.49204  | 8.667033  | 2.02  | 0.046 | .3501541 34.63392    |

```
. xi: regress WorryMainMeasure_8WEEK WorryMainMeasure_Baseline i.Centre*i.Worryscorestrata
i.treat*WorryMainMeasure_Baseline
i.Centre          _ICentre_0-1      (naturally coded; _ICentre_0 omitted)
i.Worryscores~a  _IWorryscor_0-1    (naturally coded; _IWorryscor_0 omitted)
i.Cen~e*i.Wor~a  _ICenXWor_#_#      (coded as above)
i.treat          _Itreat_0-1        (naturally coded; _Itreat_0 omitted)
i.treat*Worry~e  _ltreXWorry_#      (coded as above)
note: WorryMainMeasure_Baseline omitted because of collinearity
```

|          |  |            |     |            |                 |        |
|----------|--|------------|-----|------------|-----------------|--------|
| Source   |  | SS         | df  | MS         | Number of obs = | 143    |
| Model    |  | 7392.77228 | 6   | 1232.12871 | F( 6, 136) =    | 13.60  |
| Residual |  | 12320.976  | 136 | 90.5954115 | Prob > F =      | 0.0000 |
| Total    |  |            |     |            | R-squared =     | 0.3750 |
|          |  |            |     |            | Adj R-squared = | 0.3474 |

Total | 19713.7483 142 138.829213 Root MSE = 9.5182

| WorryMainMeasure_8WEEK    | Coef.     | Std. Err. | t     | P> t  | [95% Conf. Interval] |           |
|---------------------------|-----------|-----------|-------|-------|----------------------|-----------|
| WorryMainMeasure_Baseline | .835008   | .1631037  | 5.12  | 0.000 | .5124604             | 1.157555  |
| _ICentre_1                | -5.045471 | 2.466796  | -2.05 | 0.043 | -9.923709            | -.1672329 |
| _IWorryscor_1             | -5.8918   | 3.154601  | -1.87 | 0.064 | -12.13022            | .3466155  |
| _ICenXWor_1_1             | 10.00366  | 3.233707  | 3.09  | 0.002 | 3.608811             | 16.39851  |
| _Itreat_1                 | 13.09076  | 11.6801   | 1.12  | 0.264 | -10.00735            | 36.18887  |
| WorryMainMeasure_Baseline | 0         | (omitted) |       |       |                      |           |
| _ItreXWorry_1             | -.2998518 | .1784943  | -1.68 | 0.095 | -.6528351            | .0531315  |
| _cons                     | 9.924537  | 9.630865  | 1.03  | 0.305 | -9.121084            | 28.97016  |

```
. xi: regress WorryMainMeasure_8WEEK WorryMainMeasure_Baseline i.Centre*i.Worryscorestrata
i.treat*MAP_AlcoholAmount
i.Centre      _ICentre_0-1      (naturally coded; _ICentre_0 omitted)
i.Worryscores~a  _IWorryscor_0-1      (naturally coded; _IWorryscor_0 omitted)
i.Cen~e*i.Wor~a  _ICenXWor_#_#      (coded as above)
i.treat        _Itreat_0-1      (naturally coded; _Itreat_0 omitted)
i.treat*MAP_A~t  _ItreXMAP_A_#      (coded as above)
```

| Source   | SS         | df  | MS         | Number of obs = | 143    |
|----------|------------|-----|------------|-----------------|--------|
| Model    | 7502.63233 | 7   | 1071.80462 | F( 7, 135) =    | 11.85  |
| Residual | 12211.1159 | 135 | 90.4527105 | Prob > F =      | 0.0000 |
|          |            |     |            | R-squared =     | 0.3806 |
|          |            |     |            | Adj R-squared = | 0.3485 |
| Total    | 19713.7483 | 142 | 138.829213 | Root MSE =      | 9.5107 |

| WorryMainMeasure_8WEEK    | Coef.     | Std. Err. | t     | P> t  | [95% Conf. Interval] |           |
|---------------------------|-----------|-----------|-------|-------|----------------------|-----------|
| WorryMainMeasure_Baseline | .7273762  | .1472004  | 4.94  | 0.000 | .4362591             | 1.018493  |
| _ICentre_1                | -5.503111 | 2.478762  | -2.22 | 0.028 | -10.40534            | -.6008817 |
| _IWorryscor_1             | -6.727281 | 3.154036  | -2.13 | 0.035 | -12.96499            | -.4895689 |
| _ICenXWor_1_1             | 10.21867  | 3.237055  | 3.16  | 0.002 | 3.816772             | 16.62057  |
| _Itreat_1                 | -8.39172  | 1.89352   | -4.43 | 0.000 | -12.13652            | -4.64692  |
| MAP_AlcoholAmount         | -.1519055 | .1551586  | -0.98 | 0.329 | -.4587613            | .1549504  |
| _ItreXMAP_A_1             | .4648569  | .2364311  | 1.97  | 0.051 | -.002731             | .9324448  |
| _cons                     | 18.13268  | 8.423811  | 2.15  | 0.033 | 1.472969             | 34.79238  |

```
. xi: regress PSYRATS_total_8WEEK PSYRATS_total_Baseline i.Centre*i.Worryscorestrata
i.treat*MAP_AlcoholAmount
i.Centre      _ICentre_0-1      (naturally coded; _ICentre_0 omitted)
i.Worryscores~a  _IWorryscor_0-1      (naturally coded; _IWorryscor_0 omitted)
i.Cen~e*i.Wor~a  _ICenXWor_#_#      (coded as above)
i.treat        _Itreat_0-1      (naturally coded; _Itreat_0 omitted)
i.treat*MAP_A~t  _ItreXMAP_A_#      (coded as above)
```

| Source   | SS         | df  | MS         | Number of obs = | 143    |
|----------|------------|-----|------------|-----------------|--------|
| Model    | 1298.8105  | 7   | 185.544357 | F( 7, 135) =    | 11.05  |
| Residual | 2267.00768 | 135 | 16.7926495 | Prob > F =      | 0.0000 |
|          |            |     |            | R-squared =     | 0.3642 |
|          |            |     |            | Adj R-squared = | 0.3313 |
| Total    | 3565.81818 | 142 | 25.1113956 | Root MSE =      | 4.0979 |

| PSYRATS_total_8WEEK    | Coef.     | Std. Err. | t     | P> t  | [95% Conf. Interval] |           |
|------------------------|-----------|-----------|-------|-------|----------------------|-----------|
| PSYRATS_total_Baseline | .976256   | .1286083  | 7.59  | 0.000 | .7219083             | 1.230604  |
| _ICentre_1             | -.3491964 | 1.066414  | -0.33 | 0.744 | -2.458235            | 1.759842  |
| _IWorryscor_1          | -.650908  | 1.004881  | -0.65 | 0.518 | -2.638254            | 1.336438  |
| _ICenXWor_1_1          | .960855   | 1.396905  | 0.69  | 0.493 | -1.801793            | 3.723503  |
| _Itreat_1              | -2.380408 | .8214766  | -2.90 | 0.004 | -4.005036            | -.7557804 |
| MAP_AlcoholAmount      | -.0339031 | .0678673  | -0.50 | 0.618 | -.1681238            | .1003176  |
| _ItreXMAP_A_1          | .0585786  | .1021132  | 0.57  | 0.567 | -.1433699            | .260527   |
| _cons                  | -1.31187  | 2.2432    | -0.58 | 0.560 | -5.74823             | 3.124489  |

```
. xi: regress PSYRATS_total_8WEEK PSYRATS_total_Baseline i.Centre*i.Worryscorestrata
i.treat*WASI_IQ
i.Centre      _ICentre_0-1      (naturally coded; _ICentre_0 omitted)
i.Worryscores~a  _IWorryscor_0-1      (naturally coded; _IWorryscor_0 omitted)
i.Cen~e*i.Wor~a  _ICenXWor_#_#      (coded as above)
i.treat        _Itreat_0-1      (naturally coded; _Itreat_0 omitted)
```

i.treat\*WASI\_IQ \_ItreXWASI\_# (coded as above)

| Source   | SS         | df  | MS         | Number of obs = | 133    |
|----------|------------|-----|------------|-----------------|--------|
| Model    | 1294.66867 | 7   | 184.952668 | F( 7, 125) =    | 11.75  |
| Residual | 1968.15839 | 125 | 15.7452671 | Prob > F =      | 0.0000 |
|          |            |     |            | R-squared =     | 0.3968 |
|          |            |     |            | Adj R-squared = | 0.3630 |
| Total    | 3262.82707 | 132 | 24.7183869 | Root MSE =      | 3.968  |

| PSYRATS_total_8WEEK    | Coef.     | Std. Err. | t     | P> t  | [95% Conf. Interval] |
|------------------------|-----------|-----------|-------|-------|----------------------|
| PSYRATS_total_Baseline | .9575123  | .1277266  | 7.50  | 0.000 | .7047255 1.210299    |
| _ICentre_1             | -.3682803 | 1.096509  | -0.34 | 0.738 | -2.538408 1.801847   |
| _IWorryscor_1          | -1.023627 | 1.003416  | -1.02 | 0.310 | -3.009511 .9622568   |
| _ICenXWor_1_1          | 1.485486  | 1.427341  | 1.04  | 0.300 | -1.3394 4.310371     |
| _Itreat_1              | 4.663857  | 3.960414  | 1.18  | 0.241 | -3.174295 12.50201   |
| WASI_IQ                | .0295124  | .0276824  | 1.07  | 0.288 | -.0252745 .0842993   |
| _ItreXWASI_1           | -.0673473 | .0385116  | -1.75 | 0.083 | -.1435666 .008872    |
| _cons                  | -4.039882 | 3.913494  | -1.03 | 0.304 | -11.78517 3.705408   |

. exit, clear
